# Supplementary material for: Synthesis, Structural Characterization, Hirschfeld Surface Analysis, Density Functional Theory, and Photocatalytic CO2 Reduction Activity of a New Ca(II) Complex with a Bis-Schiff Base Ligand
Source: MDPI journal article supplement (doi:10.3390/molecules29051047), 2024-02-28
Supplement: s1 [file s1]

# Synthesis, Structural Characterization, Hirschfeld Surface Analysis, Density Functional Theory, and Photocatalytic CO<sub>2</sub> Reduction Activity of a New Ca(II) Complex with a Bis-Schiff Base Ligand

Xi-Shi Tai <sup>1,\*</sup>, Xi-Hai Yan <sup>1</sup> and Li-Hua Wang <sup>2</sup>

<sup>1</sup> College of Chemistry and Chemical Engineering, Weifang University, Weifang 261061, P. R. China

<sup>2</sup> College of Biology and Oceanography, Weifang University, Weifang 261061, P. R. China

\*Correspondence: E-mail:taixs@wfu.edu.cn (X.S. Tai) Telp: +86-536-8785286, Fax: +86-536-8785286

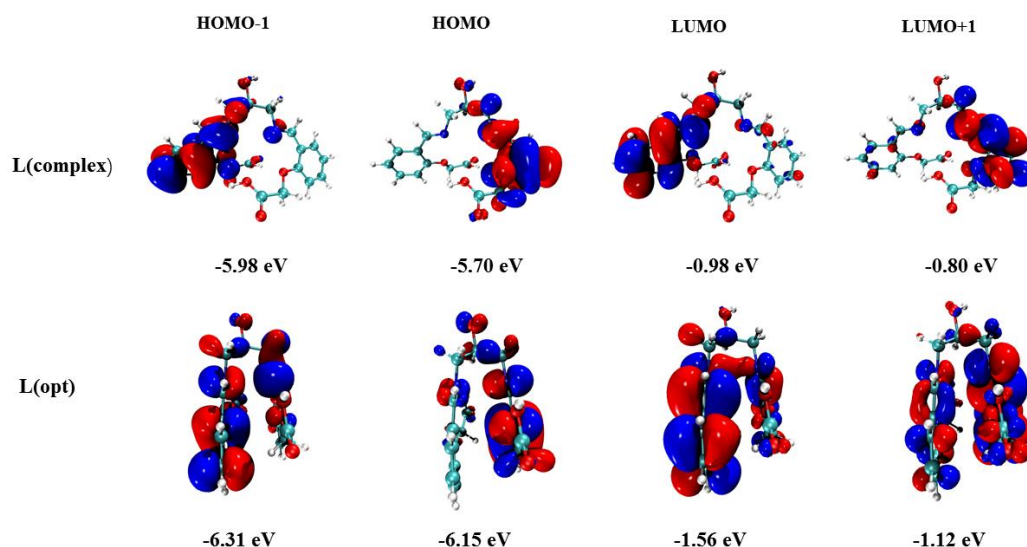

Figure S1. Electron density distributions and energy levels of HOMO-1, HOMO, LUMO and LUMO+1 for the ligand in (upper) the optimized structure and (below) the adapted crystal structure (isovalue = 0.02 e-bohr<sup>-3</sup>).

Table S1. Coordinate of Ca(II) complex.

Energy = -2126.057472 hartree

|    |             |             |             |
|----|-------------|-------------|-------------|
| Ca | 0.01111400  | -0.06310000 | 0.23077400  |
| O  | 0.74877300  | -2.23995000 | 3.97390300  |
| O  | -0.15315600 | -1.07673100 | 2.24675800  |
| O  | -0.49013000 | 4.98676500  | -0.27653900 |
| H  | 0.08338400  | 5.37212600  | -0.95757500 |

|   |             |             |             |
|---|-------------|-------------|-------------|
| O | -2.06584000 | -0.90282300 | -0.94139600 |
| O | 0.46456800  | -0.85066800 | -1.84358500 |
| O | -0.08696800 | -2.03618400 | -3.69754400 |
| O | 2.23873300  | -0.78050500 | 1.08322100  |
| N | -1.78450800 | 1.69434500  | 0.40464700  |
| N | 1.62626200  | 1.92667300  | 0.11790800  |
| C | -3.35820800 | -0.87217200 | -0.49472500 |
| C | -4.23598000 | -1.94240500 | -0.70300800 |
| H | -3.89179800 | -2.82956400 | -1.21888800 |
| C | -5.55005900 | -1.88492800 | -0.24316500 |
| H | -6.20512100 | -2.73539200 | -0.40946500 |
| C | -6.02292000 | -0.75162400 | 0.41854200  |
| H | -7.04767300 | -0.70134200 | 0.77195900  |
| C | -5.16002100 | 0.31813900  | 0.61012000  |
| H | -5.51835400 | 1.21266000  | 1.11347200  |
| C | -3.81840900 | 0.29008900  | 0.17880200  |
| C | -3.05514900 | 1.50997900  | 0.44352300  |
| H | -3.69590000 | 2.35546700  | 0.73085300  |
| C | -1.31492400 | 3.03782600  | 0.74928800  |
| H | -0.87842500 | 3.00518900  | 1.75722500  |
| H | -2.14273400 | 3.75881700  | 0.76990600  |
| C | -0.27082800 | 3.57766400  | -0.25014500 |
| H | -0.46443600 | 3.13290900  | -1.23953600 |
| C | 1.19273100  | 3.32570300  | 0.16020500  |
| H | 1.84146400  | 3.95058200  | -0.47604200 |
| H | 1.30768900  | 3.69301100  | 1.18946500  |
| C | 2.82212600  | 1.73549000  | -0.32050100 |
| H | 3.37557400  | 2.60406800  | -0.70679800 |
| C | 3.61972100  | 0.51094800  | -0.37586300 |
| C | 4.79302000  | 0.59473000  | -1.15296700 |
| H | 4.98630500  | 1.51854700  | -1.69258000 |
| C | 5.69606100  | -0.45396600 | -1.24712600 |
| H | 6.58416600  | -0.36127900 | -1.86366100 |
| C | 5.44800200  | -1.62040200 | -0.52278700 |
| H | 6.14533100  | -2.45204600 | -0.56942600 |
| C | 4.30856400  | -1.73675000 | 0.27044600  |
| H | 4.13943600  | -2.64925100 | 0.82731700  |
| C | 3.37959000  | -0.69305400 | 0.33846300  |
| C | -0.31401900 | -1.52296000 | -2.60753300 |
| C | -1.74419800 | -1.78886300 | -2.06317300 |
| H | -2.48105800 | -1.62925500 | -2.85352600 |
| H | -1.79670000 | -2.82938000 | -1.72494900 |
| C | 0.78344100  | -1.67751400 | 2.88578200  |
| C | 2.14989000  | -1.77440200 | 2.15100200  |

|   |            |             |            |
|---|------------|-------------|------------|
| H | 2.97322200 | -1.61178200 | 2.85027600 |
| H | 2.23264200 | -2.77762700 | 1.71898400 |
